# Supplementary material
Source: publisher site journal article supplement (https://www.dovepress.com/article/474098)
Supplement: Supplementary file 1 [file get_supplementary_file.php]

Supporting Information:

TME-activated MnO2/Pt nanoplatform of hydroxyl radical and oxygen generation to synergistically promote radiotherapy and MR imaging of glioblastoma

Lijuan Chen1, a, Mingbo Liu2, a, Yunjuan Wang3,4, a, Wei Wei1, Yaqiong Li 5, Yan Bai1, Xuan Yu1, Lei Jiao6, *, Meiyun Wang1,4*

1. Department of Medical Imaging, Henan Provincial People’s Hospital & the People’s Hospital of Zhengzhou University, 450003, Zhengzhou, Henan, China.
2. Department of Radiotherapy, Henan Provincial People’s Hospital & the People’s Hospital of Zhengzhou University, 450003, Zhengzhou, Henan, China.
3. School of life sciences, Henan University, North section of Jinming Avenue, 475004, Kaifeng, Henan, China.
4. Institute of Biomedicine, Henan Academy of Sciences, Chongshili Road, 450046, Zhengzhou, Henan, China.
5. Department of Pharmacy, Henan Provincial People’s Hospital & the People’s Hospital of Zhengzhou University, 450003, Zhengzhou, Henan, China.
6. Institute of Molecular Metrology, College of Chemistry and Chemical Engineering, Qingdao University, 266071, Qingdao, Shandong, China.





Figure S1. The monitoring of reactants by UV-Vis absorption spectra.


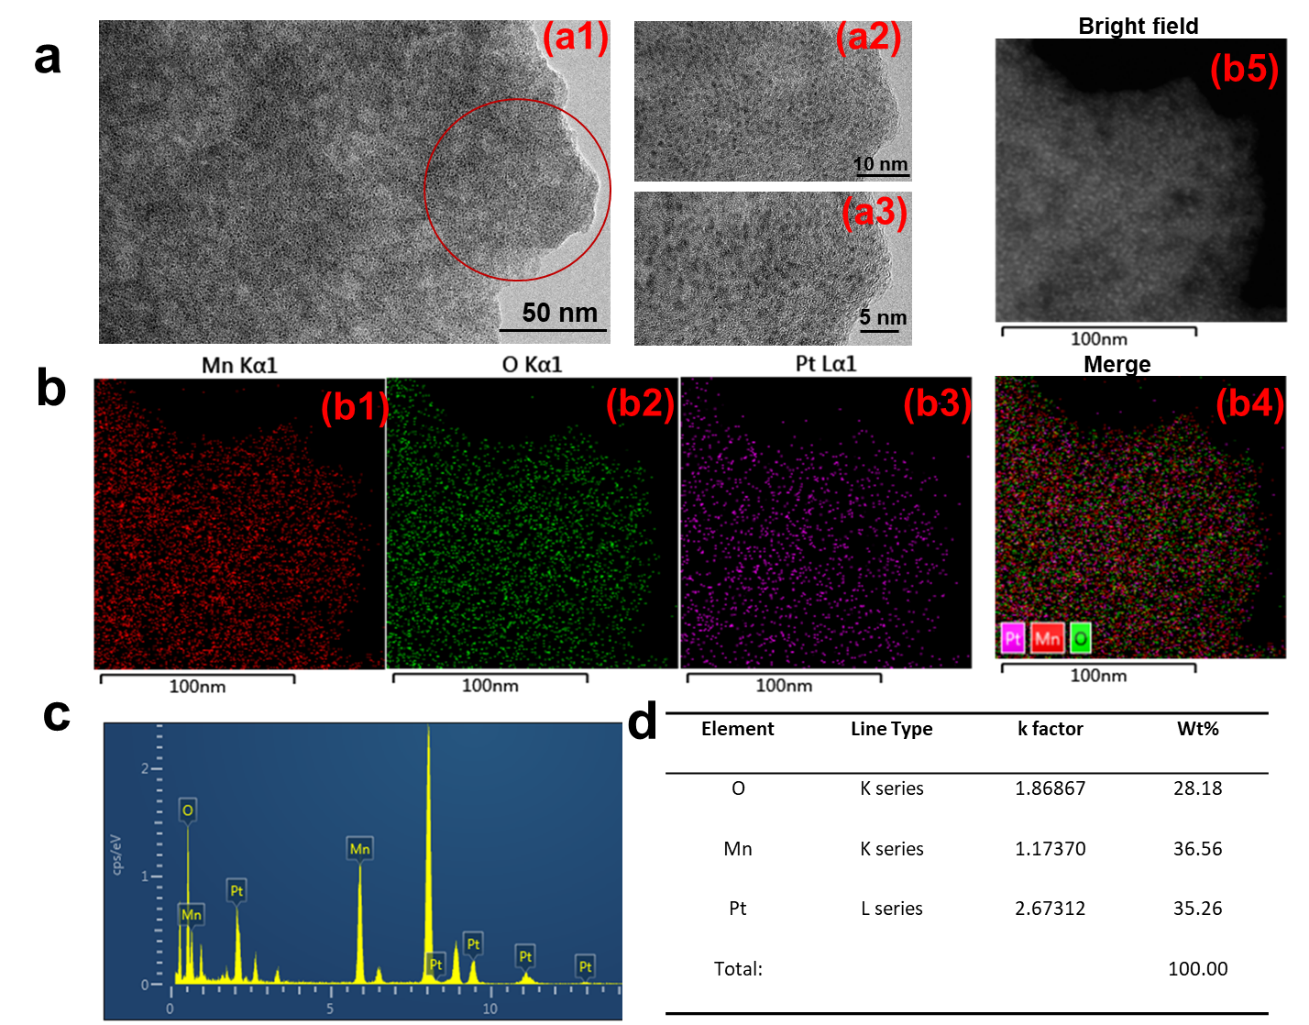


Figure S2. (a) TEM of MnO2/Pt@BSA nanoplatform at the different magnification(a1-a3), respectively, (b) the mapping based on the composite of MnO2/Pt@BSA; (b1) -(b3) Mn, O, Pt and the merge photo (b4), bright field (b5); (c) EDS were characterized by TEM and corresponding semi-quantitative analysis(d).


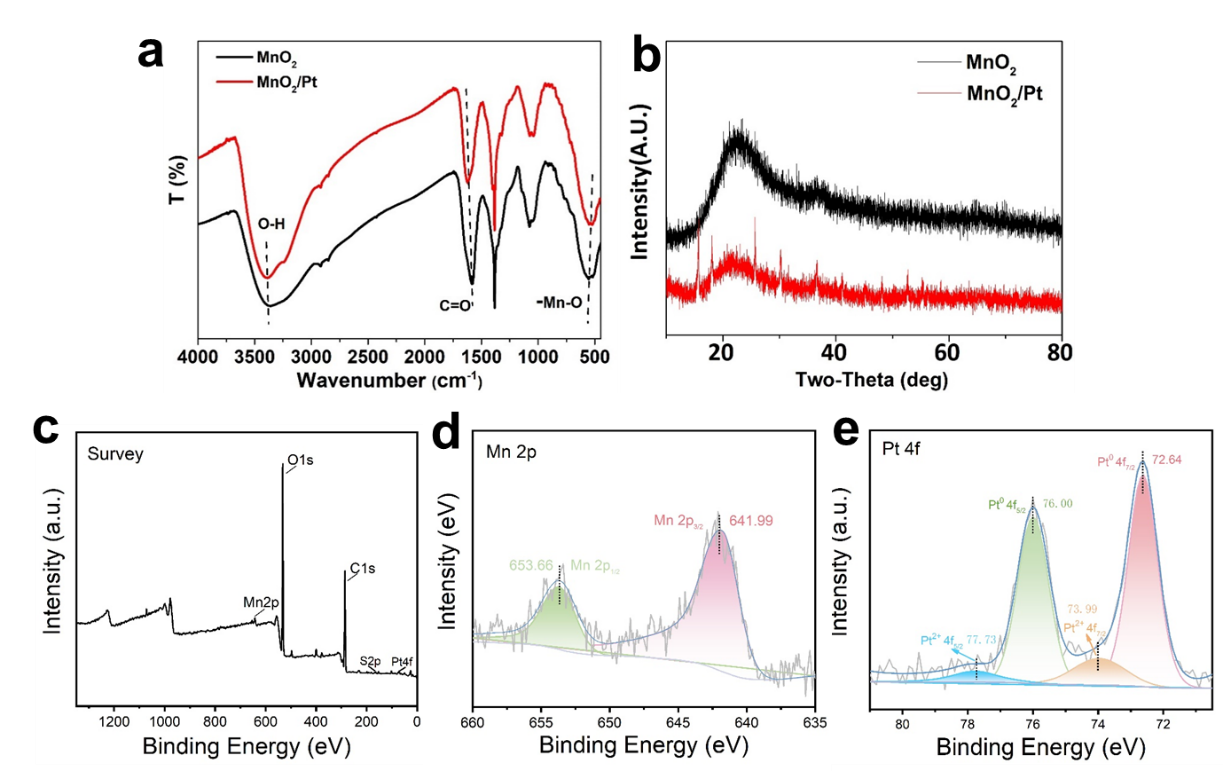


Figure S3. (a) The FTIR of MnO2 and MnO2/Pt, (b) XRD patterns of the as-prepared MnO2 and MnO2/Pt samples, (c) the full XPS spectra of MnO2/Pt, and the Mn(d), Pt (e) spectra of MnO2/Pt.


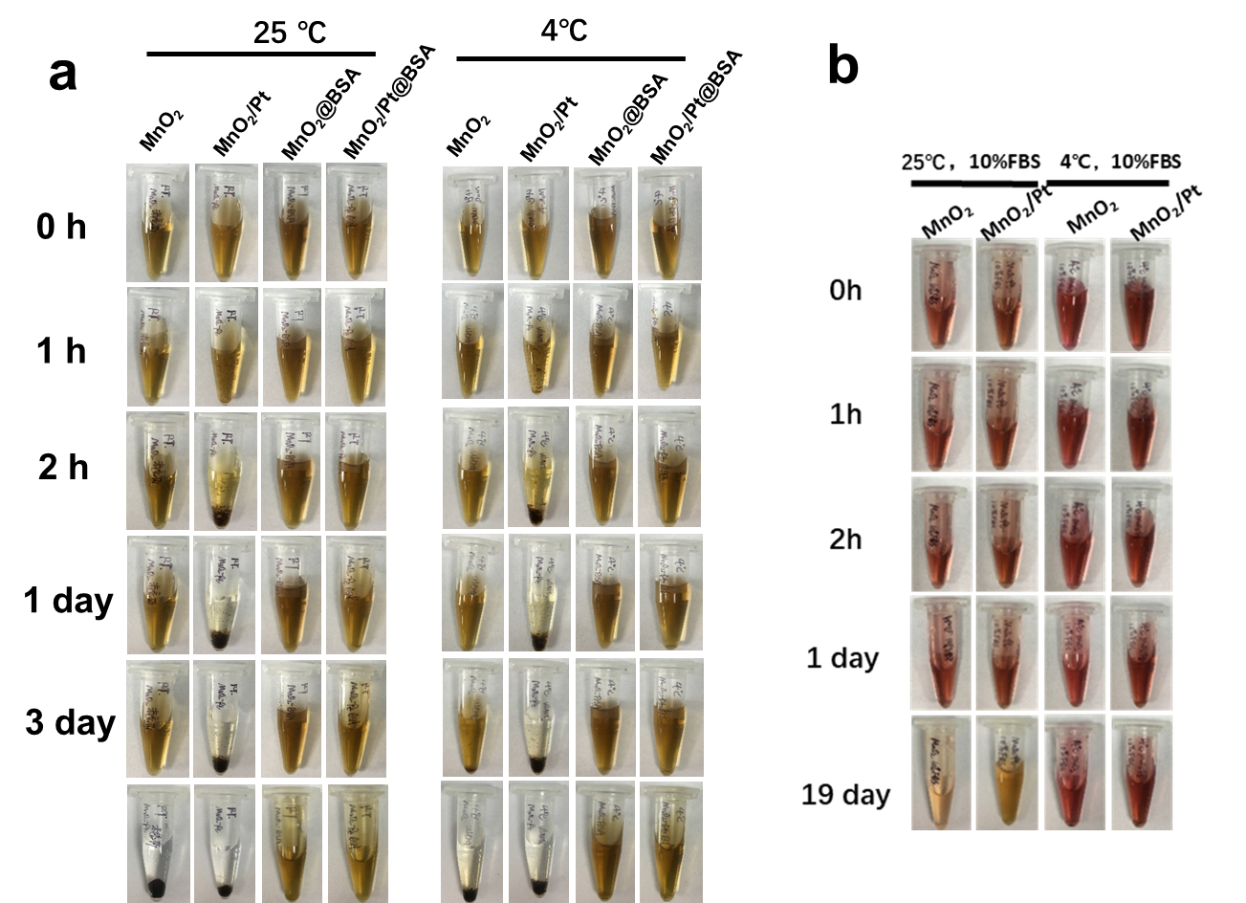


Figure S4. The storage stability of MnO2 and MnO2/Pt based nanoplatform at different temperature, timepoints and dispersion medium. (a) MnO2, MnO2/Pt, MnO2@BSA, MnO2/Pt@BSA at room temperature (RT) and 4oC conditions at 0h, 1h, 2h, 1day, 3day and 19day; (b) The stability of MnO2, MnO2/Pt dispersion in 10% FBS at 4 oC and RT at 0h, 1h, 2h, 1day and 19day.


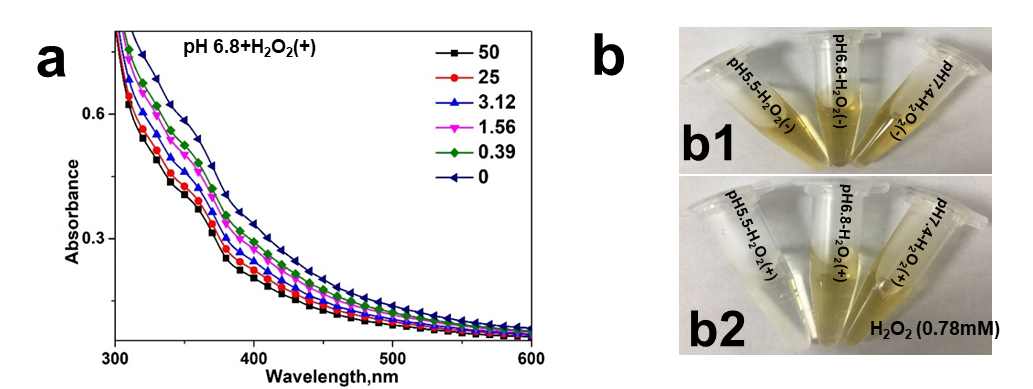


Figure S5. (a) the absorbance of MnO2/Pt@BSA after treatment with the pH 6.8 at different H2O2 concertation (50, 25, 3.12, 1.56, 0.39, 0); (b) the corresponding photos of MnO2/Pt@BSA after treatment with different pH buffer solution and (b2)/or not (b1) H2O2.


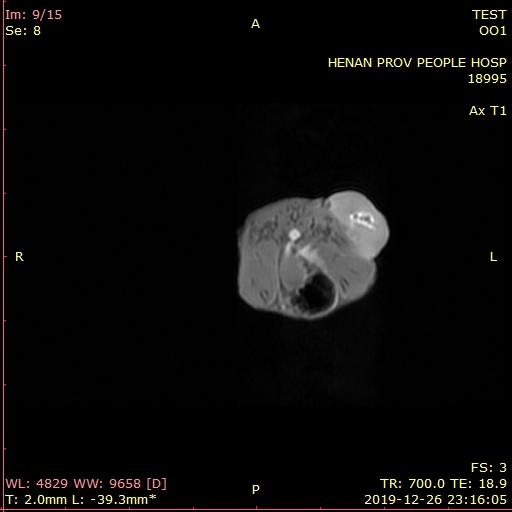


Figure S6. In vivo T1-weighted MR imaging of the in U87 tumor-bearing mice after intravenous injection. Images were acquired using a 3.0 T (GE, USA) clinical MRI scanner equipped with animal coil.


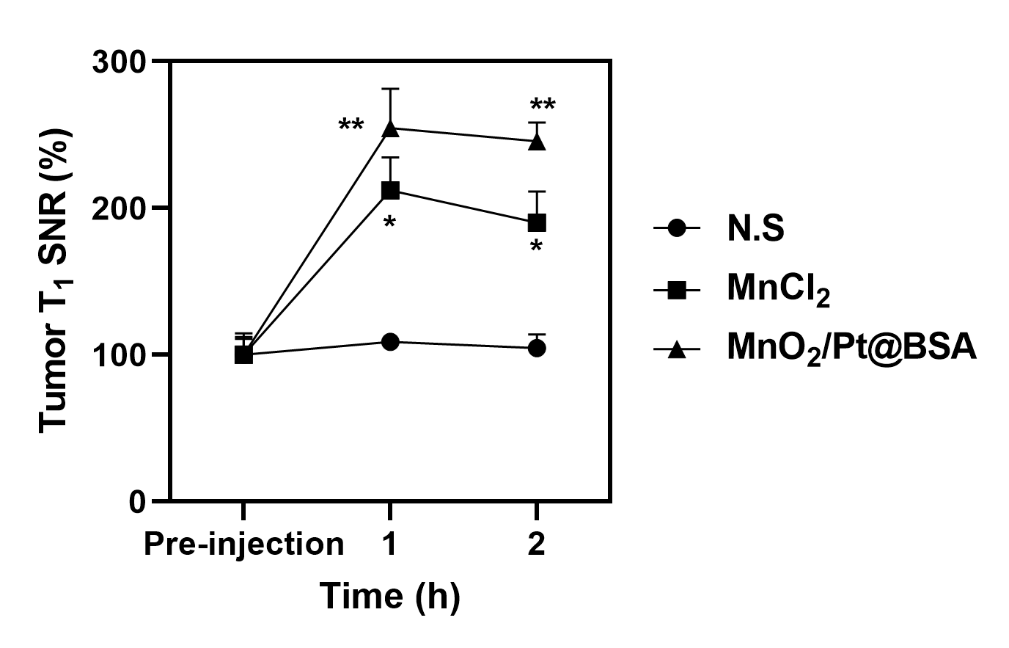


Figure S7. The relative tumor T1-weighted SNR (%) of MnO₂/Pt@BSA, MnCl2 on U87 tumor-bearing mice model C[Mn] (0.25 mmol·kg−1) with N.S as control.


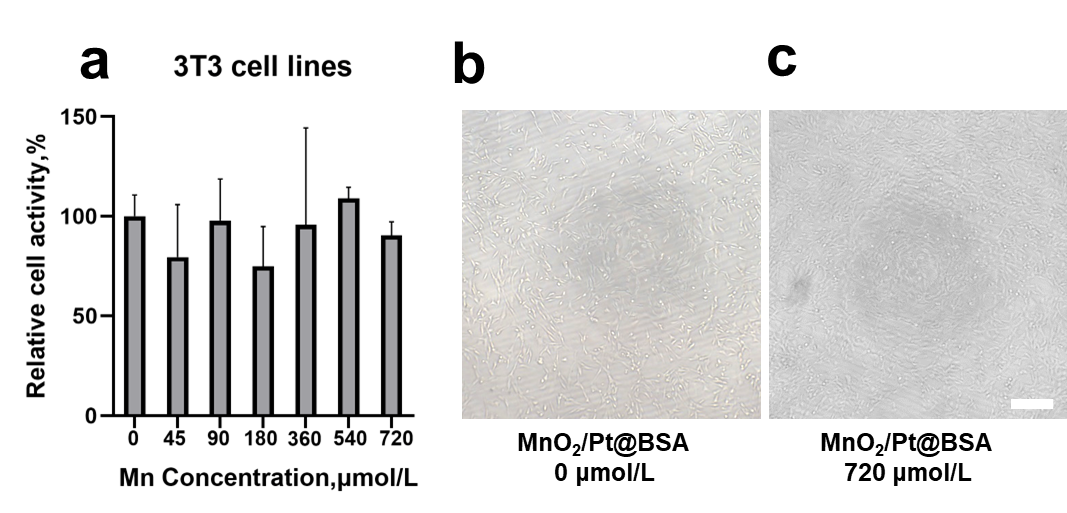


Figure S8. (a)The relative cell activity (%) of the MnO2/Pt@BSA in different concentration on 3T3 cell lines were primarily test for cytotoxicity evaluation. (b, c) The morphology of 3T3 cell lines treated with/without MnO2/Pt@BSA in the brightfield of optical microscope. (bar: 20μm)


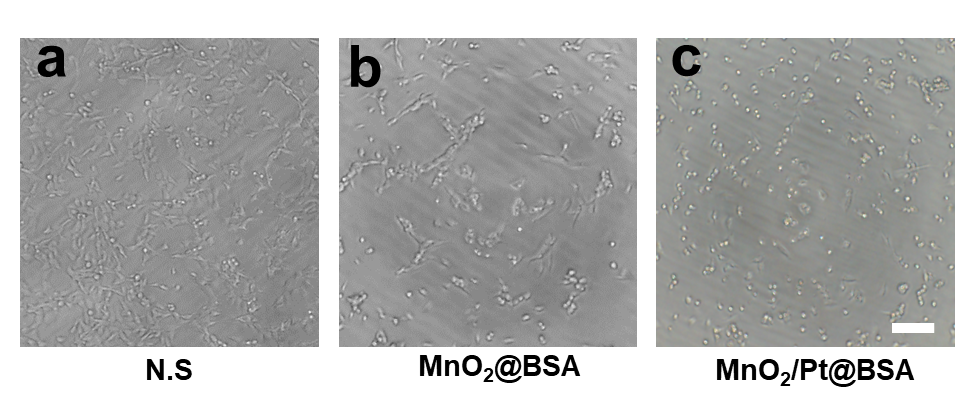


Figure S9. the morphology of U87 cells under corresponding nanoplatforms treatments (a,PBS; MnO2@BSA; b, MnO2/Pt@BSA) in the brightfield of optical microscope (bar: 20μm)


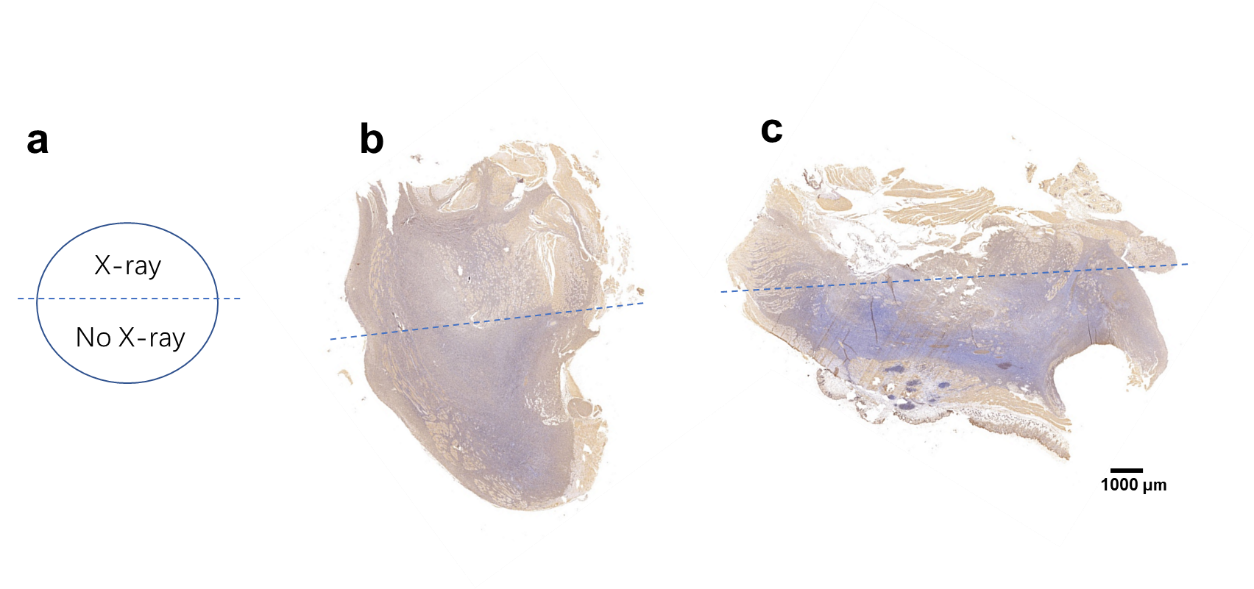


Figure S10. (a) Diagram of radiation distribution. (b) Scan view of the continuous sections of excised tumor tissue treated with N.S (B) and MnO2@BSA (c), and the boundary of X-ray irradiation (8 Gy). Scale bars: 1000 μm.


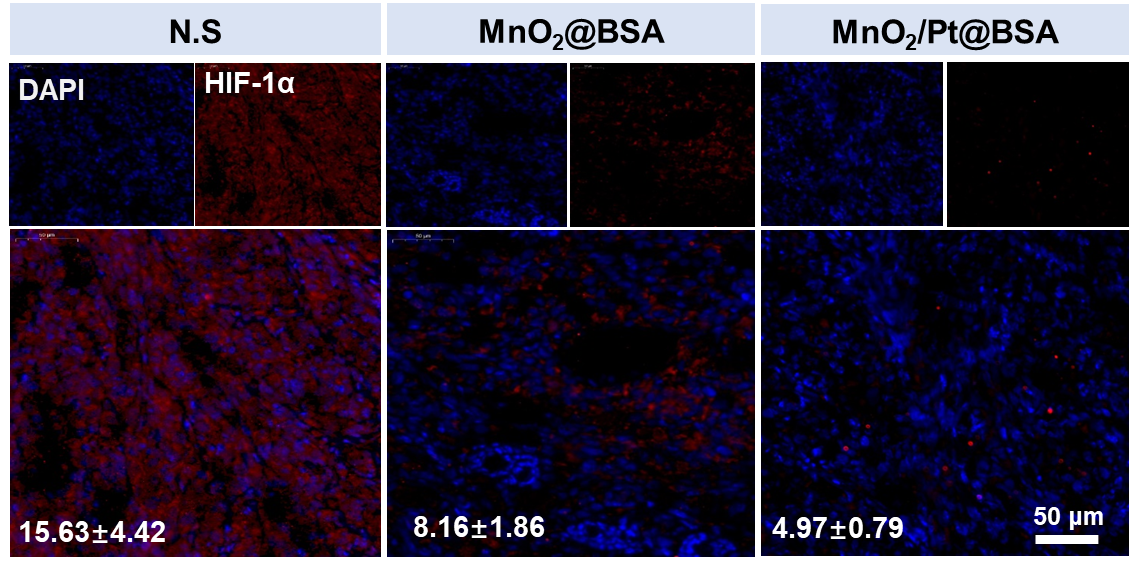


Figure S11. Representative immunofluorescence images analysis of HIF-1α protein in U87 cells. And the corresponding quantitative fluorescence intensity analysis of HIF-1α.


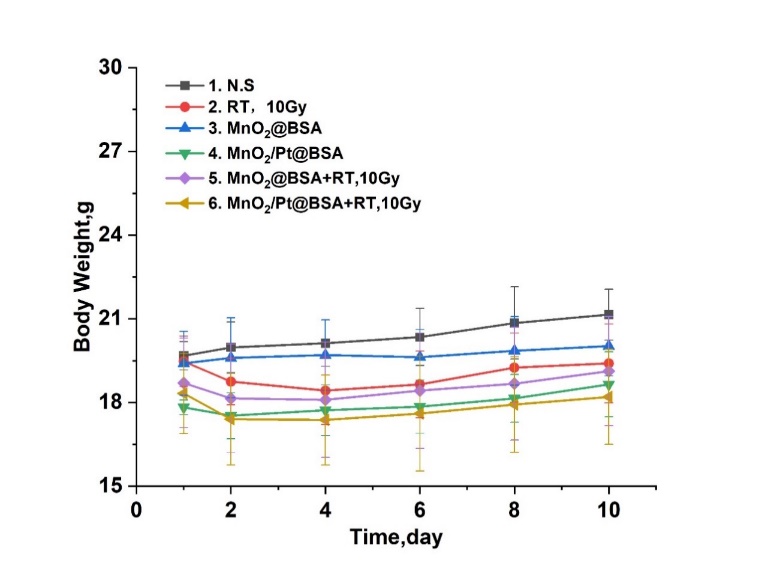


Figure S12. Body weights changes during the course of treatments.


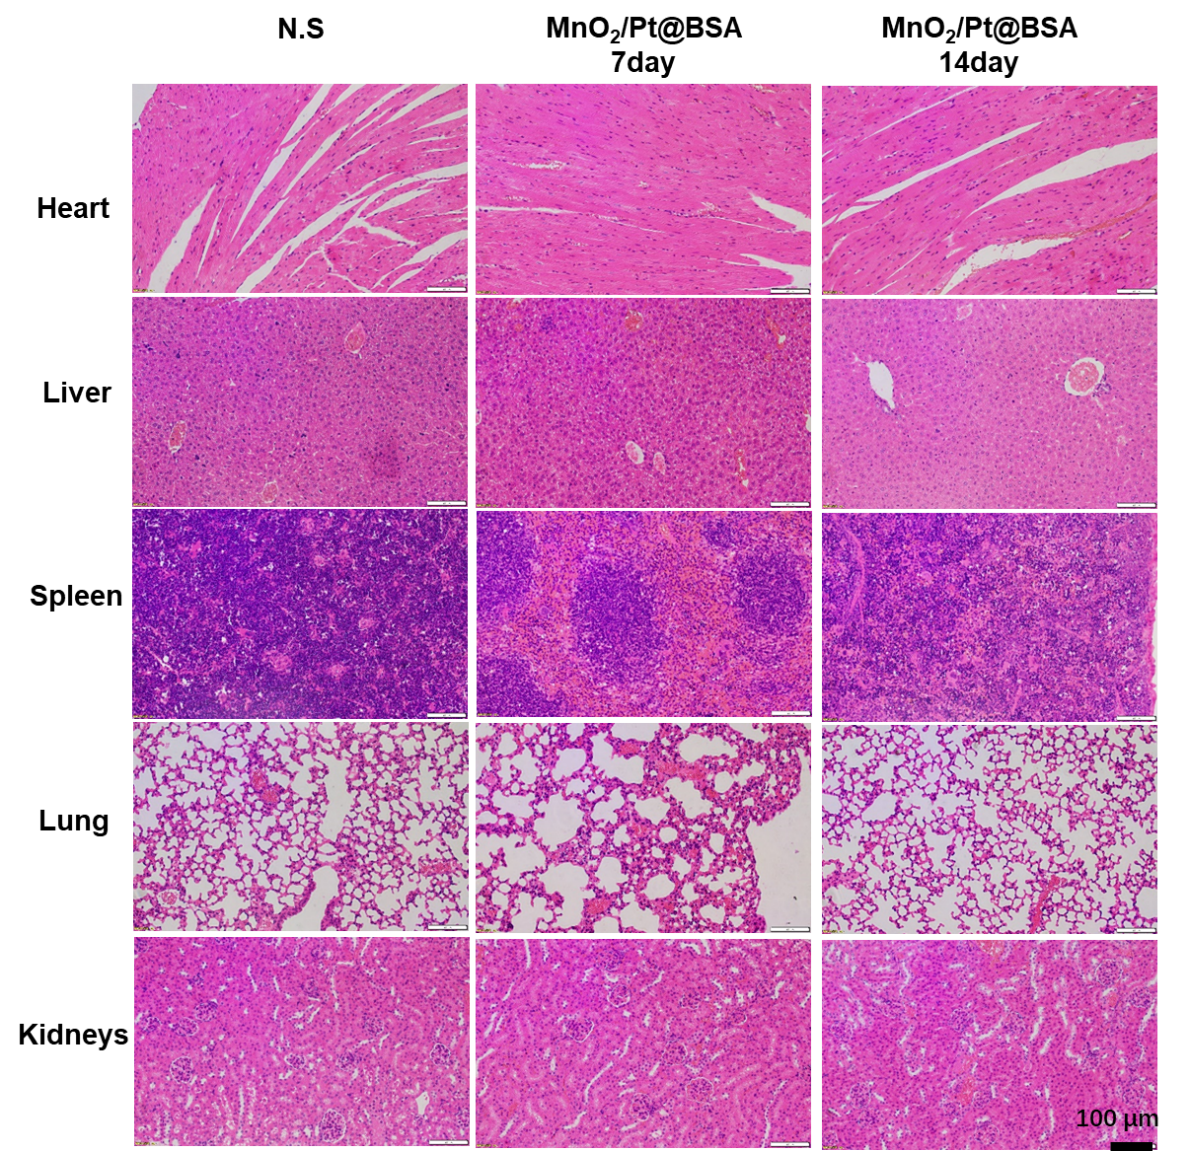


Figure S13. The hematoxylin and eosin-stained microscopy images of the corresponding groups of major organs (heart, liver, spleen, lung and kidneys) of mice after their injection of MnO2/Pt@BSA at different timepoint (7day, 14 day), saline as control. (Scan Bar:100 μm)


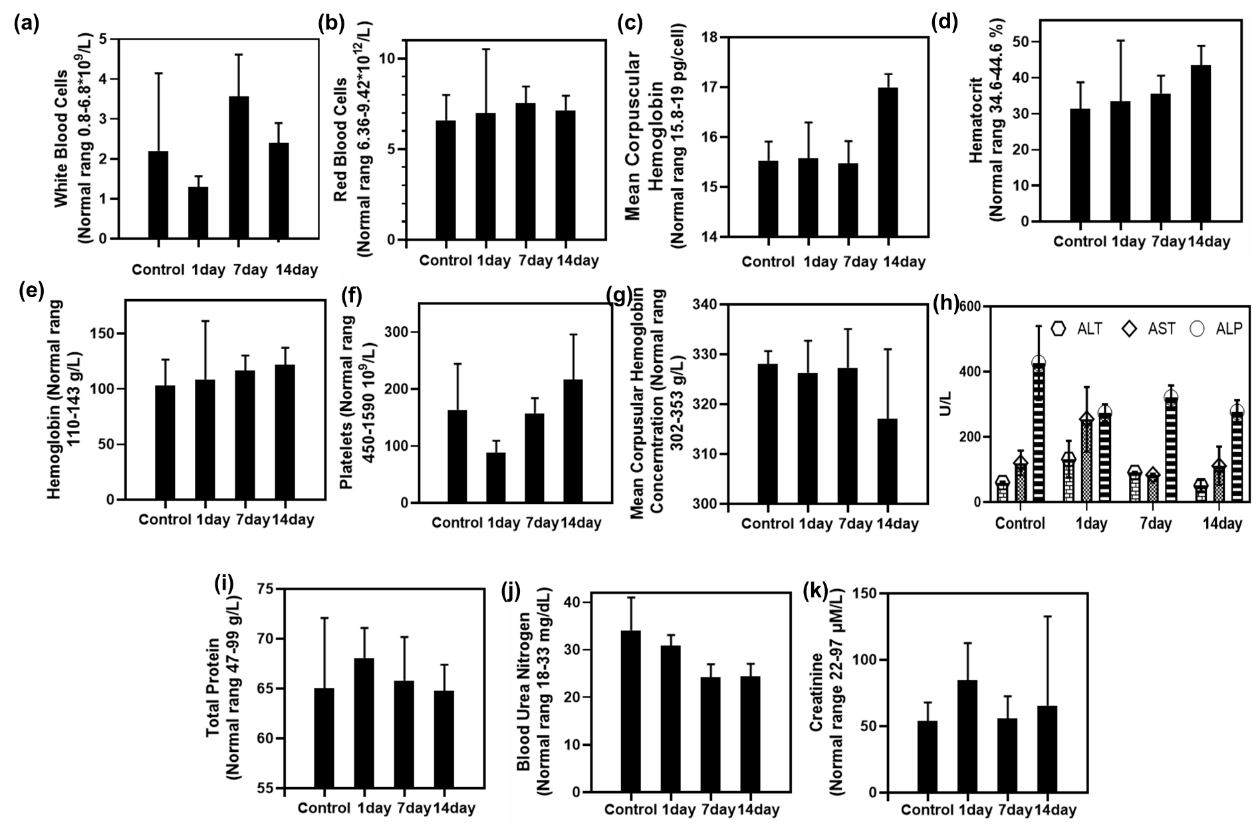


Figure S14. The complete blood counts (CBC) (a)-(h), the hepatic (i-j) and renal functions(k-l) of mice after their injection of MnO2/Pt@BSA at different timepoint (1 day, 7day, 14 day) saline as control. Results are presented as means ± standard deviation (SD) (n=3)
